# Supplementary material
Source: publisher site journal article supplement (https://www.spandidos-publications.com/8472/downloadSupplementary)

Figure S1. siRNA-mediated knockdown of DNMT1 in LINC00184-overexpressing cells. Relative DNMT1 mRNA levels were measured by quantitative PCR 48 h after transfection with siDNMT1 or non-targeting siNC. Data are normalized to GAPDH and expressed as mean  $\pm$  SEM (n=3). \*\*\*P<0.001 vs. siNC. si/siRNA, small interfering RNA; NC, negative control; DNMT1, DNA methyltransferase 1; OE, overexpression; ns, not significant.

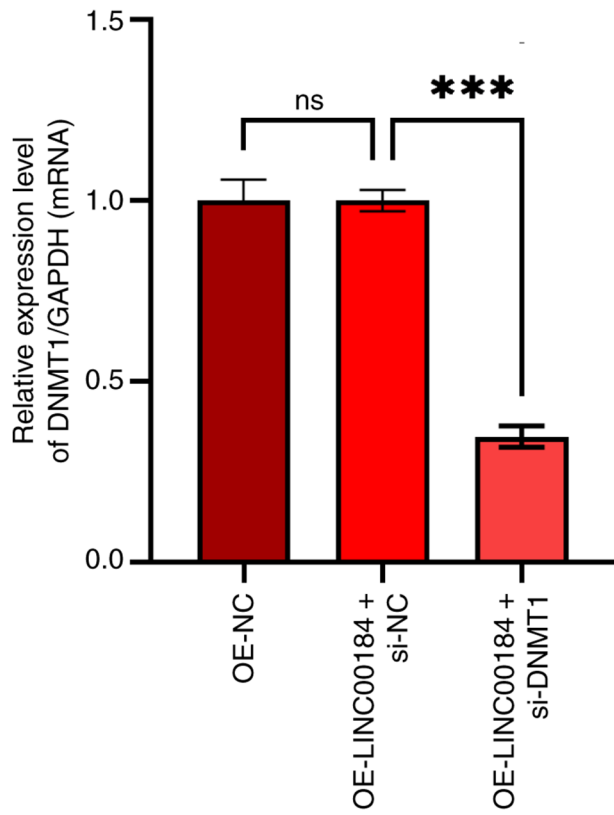

Figure S2. Dose-dependent effect of 5-AZA on cell viability in TE-1 cells. Cell viability was assessed by Cell Counting Kit-8 assay after treatment with the indicated concentrations of 5-AZA for 48 h. Data are presented as mean  $\pm$  SEM (n=6). 5-AZA, 5-azacytidine.

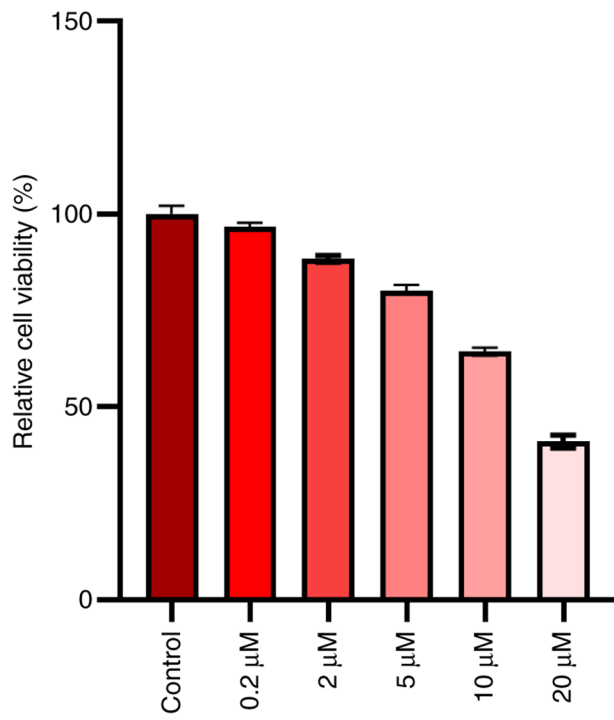

Figure S3. (A) Quantitative analysis of immunoblots of NDRG2 presented in Fig. 3A. (B) Quantitative analysis of immunoblots of pAKT/AKT presented in Fig. 3A. Comparisons among multiple groups were analyzed by one-way analysis of variance. \*\*P<0.01 and \*\*\*P<0.001. NDRG2, N-Myc downstream regulated gene; OE, overexpression; NC, negative control.

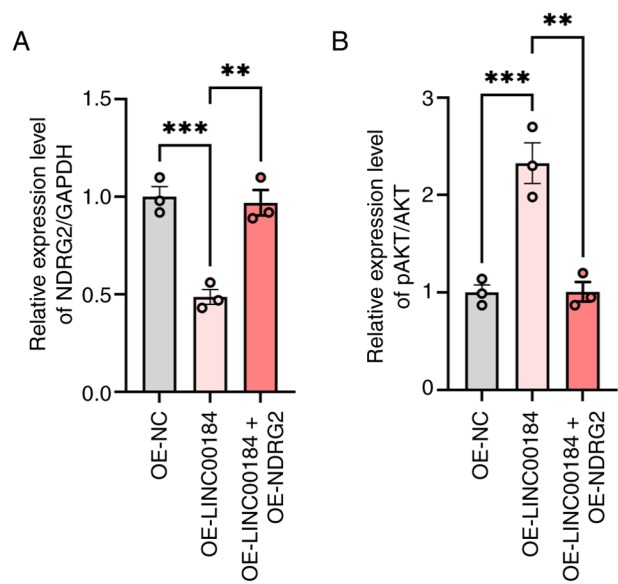

Figure S4. (A) Quantitative analysis of immunoblots of NDRG2 presented in Fig. 4N. (B) Quantitative analysis of immunoblots of DNMT1 presented in Fig. 4P. Comparisons among multiple groups were analyzed by one-way analysis of variance. \* $P < 0.05$  and \*\* $P < 0.01$ . ns, not significant; NDRG2, N-Myc downstream regulated gene; OE, overexpression; NC, negative control; si, small interfering RNA; DNMT1, DNA methyltransferase 1.

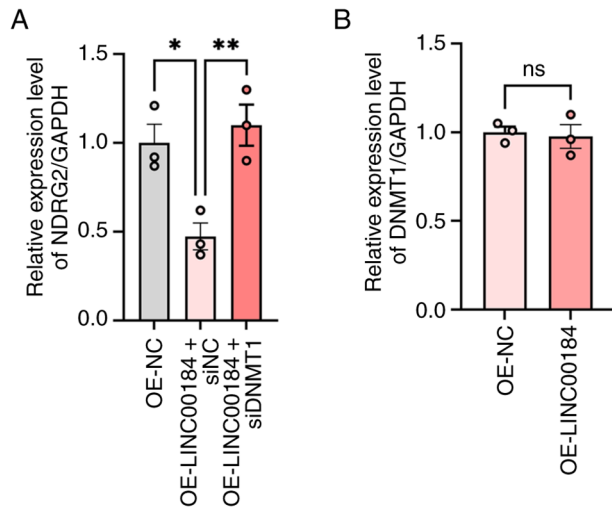

Supplement: Supplementary file 1 [file downloadSupplementary]
